# Supplementary material for: Time-Restricted Feeding during Puberty Ameliorates Adiposity and Prevents Hepatic Steatosis in a Mouse Model of Childhood Obesity
Source: MDPI journal article supplement (doi:10.3390/nu13103579), 2021-10-13
Supplement: s1 [file s1]

**Figure S1.**

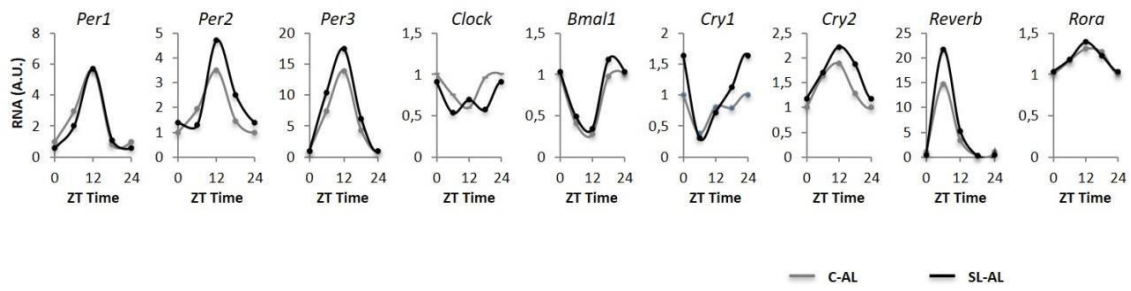

**Figure S1.** The cyclic expression of clock genes was similar in C-AL and SL-AL mice. mRNA expression levels of the clock genes during a 24-hour cycle in C-AL (grey) SL-AL (black) mice at the end of the experimental procedure. Gene expression levels were normalized to b-Actin.

**Table S1.** List of primers for real-time quantitative PCR.

| Name              | 5' > 3' Sequence         | Name              | 5' > 3' Sequence         |
|-------------------|--------------------------|-------------------|--------------------------|
| <b>b-Actin-Fw</b> | CCACCGATCCACACAGAGTA     | <b>Fasn-Fw</b>    | GCTGCAAGCACAGCCTCTCT     |
| <b>b-Actin-Rv</b> | AGTGTGACGTTGACATCCGT     | <b>Fasn-Rv</b>    | GGCATCATTGGGCACTCCTT     |
| <b>Bmal1-Fw</b>   | AACCATGTGCGAGTGCAGGCGC   | <b>Mogat1-Fw</b>  | GGTGAATGTTCTGGGTGAG      |
| <b>Bmal-Rv</b>    | GGACTTCGCTCTACCTGTTCA    | <b>Mogat1-Rv</b>  | CTGGTTCTGTTTCCCGTTGT     |
| <b>Cd36-Fw</b>    | CATTTGGCAGGTCTATCTACG    | <b>Per1-Fw</b>    | TGAAGCAAGACCGGGAGAG      |
| <b>Cd36-Rv</b>    | CAATGTCTAGCACACCATAAG    | <b>Per1-Rv</b>    | CACACACGCCGTCACATCA      |
| <b>Clock-Fw</b>   | GGAGGGAAAAGTGCTCTGTTGTAG | <b>Per2-Fw</b>    | GCGGAATCGAATGGGAGAAT     |
| <b>Clock-Rv</b>   | TTGCTCCACGGGAATCCTT      | <b>Per2-Rv</b>    | ATGCTCGCCATCCACAAGA      |
| <b>Cpt1a-Fw</b>   | GGCCTCTGTGGTACACGACAA    | <b>Per3-Fw</b>    | AGGTCTTCCCTGGCTTTGTT     |
| <b>Cpt1a-Rv</b>   | CTCAGTGGGAGCGACTCTTCA    | <b>Per3-Rv</b>    | ACAGCCCAATGTCTTCAGGT     |
| <b>Cpt2-Fw</b>    | CAGTGACACAGAAGCCTCTCTTG  | <b>Ppara-Fw</b>   | CTGGCATTGTTCCGGTTCT      |
| <b>Cpt2-Rv</b>    | CTTCCCAATGCCGTTCTCAA     | <b>Ppara-Rv</b>   | TATTCGGCTGAAGCTGGTGTAC   |
| <b>Cry1-Fw</b>    | CTGTCCGCCATTGAGTTCTATG   | <b>Pparg-Fw</b>   | AGATCCGATCGCACTTCTCA     |
| <b>Cry1-Rv</b>    | CTGGCGTGGAAGTCATCGT      | <b>Pparg-Rv</b>   | GCCTCGGGCTTCCACTAC       |
| <b>Cry2-Fw</b>    | GTTTTTCAGGCCCACTCTACCTT  | <b>Rev-erb-Fw</b> | GGTGCGCTTTGCATCGTT       |
| <b>Cry2-Rv</b>    | AGCCCAGGCCAAGAGGAA       | <b>Rev-erb-Rv</b> | GGTTGTGCGGCTCAGGAA       |
| <b>Dgat2-Fw1</b>  | CTACTTCCGAGACTACTTTC     | <b>Rora-Fw</b>    | AGCTGCCACATCACCTCTCT     |
| <b>Dgat2-Rv1</b>  | CTGTGCTGAAGTTACAGAAG     | <b>Rora-Rv</b>    | TCCCCTACTGTTCTTCACC      |
| <b>Fabp5-Fw</b>   | CAAAACCGAGAGCACAGTGA     | <b>Srebf1c-Fw</b> | GGCCAGAGAAGCAGAAGAGA     |
| <b>Fabp5-Rv</b>   | CCCTCATTGCACCTTCTCAT     | <b>Srebf1c-Rv</b> | CACATTTGAAGACATGCTCCAGCT |

**Table S2.** Summary of rhythmic parameters, including mesor, amplitude and acrophase. P-values below 0.05 indicate that the gene has rhythmic behaviour along the 24-hours cycle.

|        |             | AL                    | TRF1                  | TRF2                  |
|--------|-------------|-----------------------|-----------------------|-----------------------|
| Per1   | Mesor       | 2.69 (1.95 - 3.43)    | 8.96 (8.14 - 9.78)    | 6,91                  |
|        | Amplitude   | 2.46 (1.13 - 3.78)    | 11.67 (9.32 - 14.23)  | ---                   |
|        | Acroph time | 11.96 (9.03 - 14.81)  | 14.95 (15.56 - 14.12) | ---                   |
|        | p           | <0.001                | <0.001                | 0,23                  |
| per2   | Mesor       | 2.71 (2.2 - 3.22)     | 3.22 (2.6 - 3.84)     | 4.31 (3.41 - 5.21)    |
|        | Amplitude   | 1.84 (0.83 - 2.96)    | 2.73 (1.08 - 4.56)    | 4.49 (2.82 - 6.39)    |
|        | Acroph time | 13.99 (10.91 - 16.18) | 15.59 (16.97 - 12.73) | 9.28 (7.65 - 11.52)   |
|        | p           | <0.001                | <0.001                | <0.001                |
| per3   | Mesor       | 8.95 (7.14 - 10.76)   | 10.66 (9.65 - 11.66)  | 9.48 (2.7 - 16.27)    |
|        | Amplitude   | 8.42 (5.16 - 11.77)   | 13.41 (10.58 - 16.52) | 48.75 (28.88 - 68.69) |
|        | Acroph time | 11.14 (9.13 - 13.38)  | 14.86 (15.52 - 13.95) | 6.23 (5.35 - 7.23)    |
|        | p           | <0.001                | <0.001                | <0.001                |
| cry1   | Mesor       | 1.05 (0.89 - 1.21)    | 1.4 (0.86 - 1.94)     | 0.81 (0.69 - 0.92)    |
|        | Amplitude   | 0.72 (0.38 - 1.1)     | ---                   | 0.36 (0.1 - 0.66)     |
|        | Acroph time | 20.78 (19.16 - 23.13) | ---                   | 20.2 (18.12 - 24.66)  |
|        | p           | <0.001                | 0,06                  | 0,01                  |
| cry2   | Mesor       | 1.72 (1.55 - 1.9)     | 2.27 (1.94 - 2.61)    | 1.44 (0.95 - 1.93)    |
|        | Amplitude   | 0.53 (0.22 - 0.85)    | 1.06 (0.5 - 1.82)     | 2.92 (1.48 - 4.39)    |
|        | Acroph time | 12.41 (9.09 - 15.4)   | 13 (15.59 - 9.07)     | 7.09 (6.05 - 8.61)    |
|        | p           | <0.001                | 0,00                  | <0.001                |
| reverb | Mesor       | 5.15 (3.06 - 7.24)    | 1.31 (0.93 - 1.7)     | 2,83                  |
|        | Amplitude   | 13.21 (7.72 - 18.75)  | 1.77 (0.89 - 2.82)    | 46.97 (28.25 - 65.74) |
|        | Acroph time | 6.82 (5.73 - 8.11)    | 8.12 (10.98 - 6.64)   | 6.14 (5.28 - 7.1)     |
|        | p           | <0.001                | 0,00                  | <0.001                |
| bmal1  | Mesor       | 0.73 (0.61 - 0.85)    | 0.56 (0.41 - 0.71)    | 0.6 (0.52 - 0.69)     |
|        | Amplitude   | 0.46 (0.21 - 0.72)    | 0.72 (0.35 - 1.21)    | 0.7 (0.52 - 0.91)     |
|        | Acroph time | 21.18 (19.2 - 24.03)  | 2.8 (4.34 - 23.41)    | 20.86 (19.91 - 22.14) |
|        | p           | <0.001                | 0,00                  | <0.001                |
| clock  | Mesor       | 0.73 (0.59 - 0.86)    | 0.49 (0.4 - 0.59)     | 0.87 (0.72 - 1.01)    |
|        | Amplitude   | ---                   | ---                   | 0.31 (0.08 - 0.62)    |
|        | Acroph time | ---                   | ---                   | 23.81 (19.3 - 28.36)  |
|        | p           | 0,35                  | 0,16                  | 0,02                  |
| rora   | Mesor       | 1.21 (1.12 - 1.31)    | 1.11 (0.96 - 1.25)    | 0.9 (0.65 - 1.15)     |
|        | Amplitude   | 0.18 (0.02 - 0.37)    | 1.4 (0.87 - 1.94)     | 1.51 (0.73 - 2.29)    |
|        | Acroph time | 12.6 (7.28 - 17.05)   | 6.19 (6.97 - 5.57)    | 5.85 (4.64 - 6.97)    |
|        | p           | 0,03                  | 0,00                  | <0.001                |

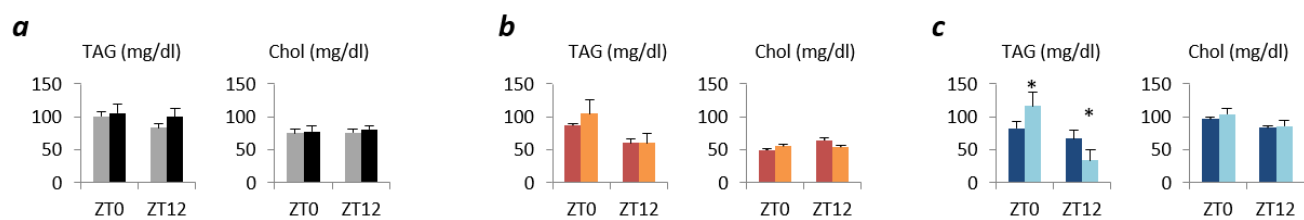

**Figure S2.** The cyclic expression of clock genes was similar in C-AL and SL-AL mice.
